1 Title: **The ground level ozone concentration is inversely correlated with the number of**  
2 **COVID-19 cases in Warsaw, Poland**

3 Oskar Wiśniewski <sup>a\*</sup>, Wiesław Kozak <sup>a</sup>, Maciej Wiśniewski <sup>b</sup>

4 <sup>a</sup> Department of Immunology, Nicolaus Copernicus University in Toruń, 1 Lwowska Street,  
5 Toruń, Poland

6 <sup>b</sup> ImmQuest, 17 Uniwersytecka Street, Toruń, Poland

7 \* corresponding author – e-mail: [owisniew@doktorant.umk.pl](mailto:owisniew@doktorant.umk.pl)

8 **ABSTRACT**

9 COVID-19, which is a consequence of infection with the novel viral agent SARS-CoV-2, first  
10 identified in China (Hubei Province), has been declared a pandemic by the WHO. As of  
11 September 10, 2020, over 70,000 cases and over 2,000 deaths have been recorded in Poland.  
12 Of the many factors contributing to the level of transmission of the virus, the weather appears  
13 to be significant. In this work we analyse the impact of weather factors such as temperature,  
14 relative humidity, wind speed and ground level ozone concentration on the number of  
15 COVID-19 cases in Warsaw, Poland. The obtained results show an inverse correlation  
16 between ground level ozone concentration and the daily number of COVID-19 cases.

17

18 **1. INTRODUCTION**

19 COVID-19 is a disease caused by the novel viral agent SARS-CoV-2. It was first identified  
20 and described in central China (Wuhan, Hubei Province) in December 2019. The World  
21 Health Organization announced COVID-19 outbreak a pandemic on March 12, 2020. Until  
22 now (September 10, 2020), over 27 million cases and nearly 900,000 deaths caused by this  
23 disease were reported worldwide. In Poland, these rates amounted to over 70,000 cases and

24 over 2,000 deaths. Each COVID-19 case follows an individual course. Most infected people  
25 develop symptoms that can be described as mild to moderate. Such people recover without  
26 hospitalization. However, severe symptoms of the disease are: shortness of breath, high fever,  
27 cough, loss of sense of smell, and muscle pain. The mean incubation period of SARS-CoV-2  
28 was estimated to be 6.4 days, ranging from 2.1 to 11.1 days (Lauer et al. 2020).

29 The first case of the novel coronavirus in Poland was reported on March 4, 2020 (in the  
30 western region of the country). The Polish government declared the state of epidemic threat  
31 on March 14, 2020 and the state of epidemic was declared on March 20, 2020. At this time,  
32 many restrictions were introduced, such as the obligation to wear face masks, a ban on  
33 gathering and moving in groups, and the closure of certain service points. It was also  
34 recommended not to travel for Easter and the long weekend (in the beginning of May).

35 It is widely known that weather conditions can influence the transmission of various viruses.  
36 Bi et al. (2007) found an inverse association between the number of daily cases of SARS and  
37 ambient temperature, and a positive association with air pressure during the epidemic of 2003  
38 in Beijing and Hong Kong. Moreover, several epidemiological analyses identified absolute  
39 humidity and temperature as climatic predictors of influenza virus transmission in temperate  
40 regions of the world (Lowen and Steel, 2014). The mechanisms by which weather factors  
41 shaping the viral transmissibility remain unclear. Possible explanations consider the instability  
42 of some viruses at high temperatures, better adhesion to objects at higher humidity, and higher  
43 transmission during strong winds.

44 In the present report, we analyse the impact of daily average temperature, relative humidity,  
45 wind speed and ground level ozone concentration on the number of daily COVID-19 cases.  
46 As far as we know, our work is the first to consider the impact of weather factors on SARS-  
47 CoV-2 transmission in Poland.

48

## 49 **2. METHODS**

### 50 **2.1. Study area**

51 Warsaw is the capital of the Republic of Poland. It is located in the central-eastern part of the  
52 country (52° 14' 13.3764" N, 21° 1' 3.1152" E), in the area of humid continental climate  
53 (Köppen climate classification). According to data from December 31, 2019, it is inhabited by  
54 1,790,658 people and its area covers 517.24 km<sup>2</sup> (including the Vistula river).

### 55 **2.2. Data collection**

56 Data on the daily number of cases (confirmed by the RT-PCR method) between April 7, 2020  
57 and June 7, 2020 were obtained from the official reports of the District Sanitary-  
58 Epidemiological Station in Warsaw. The weather data from April 1, 2020 to June 1, 2020:  
59 daily average temperature [°C], relative humidity [%] and wind speed [m/s] for the period of  
60 two months were obtained from the publicly available repository of Polish Institute of  
61 Meteorology and Water Management (*Warszawa-Bielany* weather monitoring station). The  
62 daily ground level ozone (O<sub>3</sub>) [µg/m<sup>3</sup>] measurements were obtained from the publicly  
63 available database of the Chief Inspectorate of Environmental Protection (*Warszawa-  
64 Chroscickiego* air pollution monitoring station). Data on confirmed daily cases were paired  
65 with weather data seven days earlier (due to reasons described below).

### 66 **2.3. Data analysis**

67 Since the data were not normally distributed, Spearman rank correlation test was used to  
68 examine the relationship between particular weather factors and daily COVID-19 cases.

69

## 70 **3. RESULTS AND DISCUSSION**

71

72 Between April 7, 2020 and June 7, 2020 a total number of 917 COVID-19 cases were  
73 reported in Warsaw. The lowest daily average temperature recorded in the period between  
74 April 1, 2020 and June 1, 2020 was 3.9 °C, while the highest daily average temperature was  
75 20.1 °C. The lowest daily relative humidity recorded was 35.5%, while the highest daily  
76 relative humidity was 87%. The lowest wind speed recorded was 1 m/s, while the highest  
77 wind speed was 5.7 m/s. The lowest daily average ground level O<sub>3</sub> concentration recorded was  
78 53.9 µg/m<sup>3</sup>, while the highest ground level O<sub>3</sub> concentration was 97.9 µg/m<sup>3</sup>. Changes of  
79 respective values over time are presented in Figure 1.

80 The obtained data indicate that only the average daily ambient ozone concentration is  
81 inversely correlated with the number of COVID-19 cases (Tab. 1). Pairing of the daily case  
82 numbers with the weather conditions 7 days earlier is in our opinion corresponds more to  
83 reality than comparing the case numbers and the weather conditions on the same day. It was  
84 done due to the average incubation period of the coronavirus and the average 24-hour waiting  
85 period for the RT-PCR test result in Poland.

86 There is a number of publications describing the impact of weather conditions on the spread  
87 of the novel coronavirus. Tosepu et al. (2020) found that only daily average temperature was  
88 significantly correlated with number of COVID-19 cases in Jakarta. Luo et al. (2020) reported  
89 a positive correlation between absolute humidity and case increase, and a weak negative  
90 correlation between weather temperature and case increase in several regions in Asia. A study  
91 on the effects of temperature and humidity on the daily new cases and new deaths of COVID-  
92 19 in 166 countries revealed that both factors were negatively related to the daily new cases  
93 and daily new deaths of COVID-19 (Wu et al., 2020). Unfortunately, there are no detailed  
94 local data on this subject from Central and Eastern Europe.

95 Only a few papers describe the effects of ambient ozone concentration on COVID-19. A  
96 recent paper from China shows that the COVID-19 transmissibility could be negatively  
97 associated with ambient ozone (Ran et al., 2020). On the contrary, a positive correlation was  
98 found between COVID-19 infections and ground level ozone in Milan, Italy (Zoran et al.,  
99 2020). An analysis performed by Adhikari and Yin (2020) showed that daily average  
100 temperature, daily maximum eight-hour ozone concentration, average relative humidity, and  
101 cloud percentages were significantly and positively associated with new confirmed cases  
102 related to COVID-19, but none of these variables showed significant associations with new  
103 deaths related to COVID-19. It should be noted that from a biological point of view, ozone is  
104 generally considered as an antiviral agent that damages the viral capsid and upsets its  
105 reproductive cycle (Elvis and Ekta, 2011).

106 It must be emphasized that our research has some limitations. Warsaw, as the largest city in  
107 the country, is the main communication hub, and the mobility of its inhabitants is at a high  
108 level - many of them are commuters from surrounding regions. In addition, the inhabitants are  
109 characterized by different hygienic habits, lifestyle, profession, etc. Due to this fact, social  
110 factors, in addition to weather conditions, play a significant role in the spread of the virus.

#### 111 **4. CONCLUSIONS**

112 Of the factors studied, only ozone concentration seems to have an impact on the number of  
113 new COVID-19 cases. Further research is needed, for example in other Polish cities, to  
114 characterize the remaining weather factors that may influence the spread of the virus.

#### 115 **5. FUNDING**

116 This research did not receive any specific grant from funding agencies in the public,  
117 commercial, or not-for-profit sectors.

#### 118 **DECLARATION OF CONFLICTS OF INTEREST**

119 The authors declared that they have no conflict of interests.

## 120 **ACKNOWLEDGEMENTS**

121 The authors are grateful to Dr. Maciej Wachulec, who supported and encouraged this  
122 research.

## 123 **REFERENCES**

124 Adhikari, A., & Yin, J. (2020). Short-Term Effects of Ambient Ozone, PM<sub>2.5</sub>, and

125 Meteorological Factors on COVID-19 Confirmed Cases and Deaths in Queens, New York.

126 International Journal of Environmental Research and Public Health, 17(11), 4047, DOI:

127 10.3390/ijerph17114047

128 Bi, P., Wang, J., & Hiller, J. E. (2007). Weather: driving force behind the transmission of

129 severe acute respiratory syndrome in China?. Internal Medicine Journal, 37(8), 550-554, DOI:

130 10.1111/j.1445-5994.2007.01358.x

131 Elvis, A. M., & Ekta, J. S. (2011). Ozone therapy: A clinical review. Journal of natural science,

132 biology, and medicine, 2(1), 66, DOI: 10.4103/0976-9668.82319

133 Lauer, S. A., Grantz, K. H., Bi, Q., Jones, F. K., Zheng, Q., Meredith, H. R., Azman, A. S., Reich N.,

134 G., & Lessler, J. (2020). The incubation period of coronavirus disease 2019 (COVID-19) from

135 publicly reported confirmed cases: estimation and application. Annals of internal medicine, 172(9),

136 577-582, DOI: 10.7326/M20-0504

137 Lowen, A. C., & Steel, J. (2014). Roles of humidity and temperature in shaping influenza seasonality.

138 Journal of virology, 88(14), 7692-7695., DOI: 10.1128/JVI.03544-13

139 Luo, W., Majumder, M., Liu, D., Poirier, C., Mandl, K., Lipsitch, M., & Santillana, M.

140 (2020). The role of absolute humidity on transmission rates of the COVID-19 outbreak,

141 medRxiv 2020.02.12.20022467, DOI: 10.1101/2020.02.12.20022467

- 142 Ran, J., Zhao, S., Han, L., Chen, D., Yang, Z., Yang, L., Wang, M., H., & He, D. (2020). The  
143 ambient ozone and COVID-19 transmissibility in China: A data-driven ecological study of  
144 154 cities. *The Journal of infection*, 81(3): e9–e11, DOI: 10.1016/j.jinf.2020.07.011
- 145 Tosepu, R., Gunawan, J., Effendy, D. S., Lestari, H., Bahar, H., & Asfian, P. (2020).  
146 Correlation between weather and Covid-19 pandemic in Jakarta, Indonesia. *Science of The*  
147 *Total Environment*, 138436, DOI: 10.1016/j.scitotenv.2020.138436
- 148 Wu, Y., Jing, W., Liu, J., Ma, Q., Yuan, J., Wang, Y., Du, M., & Liu, M. (2020). Effects of  
149 temperature and humidity on the daily new cases and new deaths of COVID-19 in 166  
150 countries. *Science of the Total Environment*, 139051, DOI: 10.1016/j.scitotenv.2020.139051
- 151 Zoran, M. A., Savastru, R. S., Savastru, D. M., & Tautan, M. N. (2020). Assessing the  
152 relationship between ground levels of ozone (O<sub>3</sub>) and nitrogen dioxide (NO<sub>2</sub>) with  
153 coronavirus (COVID-19) in Milan, Italy. *Science of The Total Environment*, 140005, DOI:  
154 10.1016/j.scitotenv.2020.140005

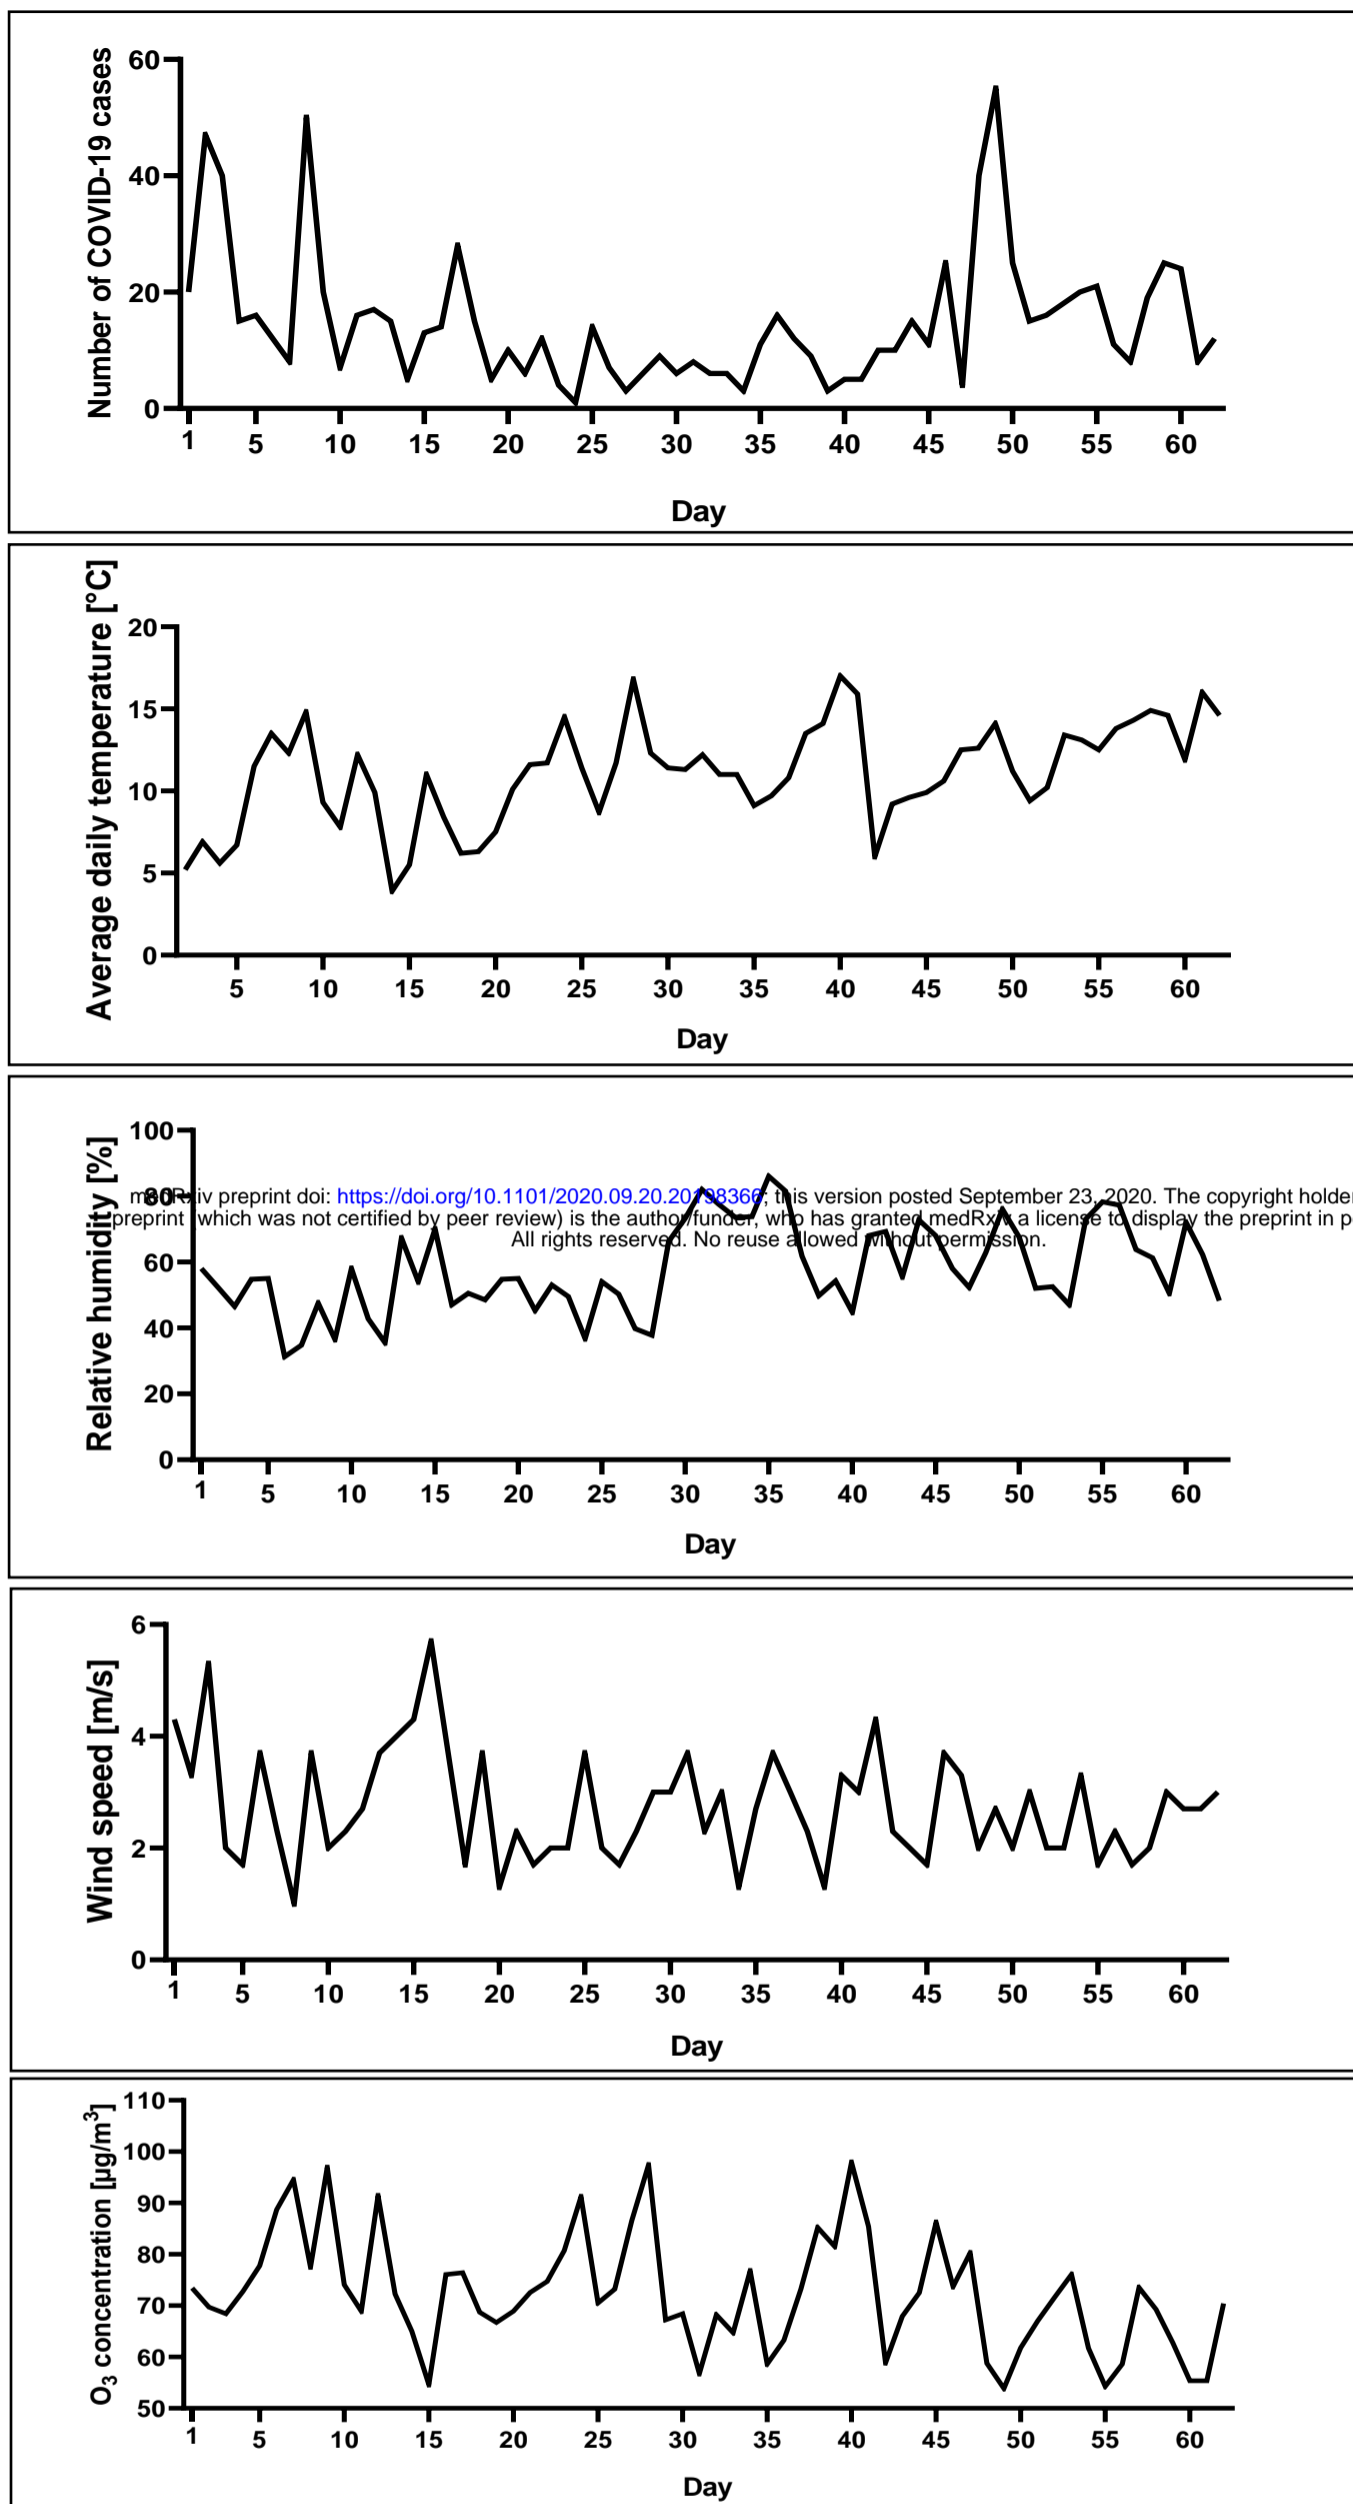

Figure 1. Daily cases of the COVID-19, daily average temperature [°C], relative humidity [%], wind speed [m/s] and average ground level ozone concentration [ $\mu\text{g}/\text{m}^3$ ] in Warsaw, Poland from April 7 to June 7, 2020 (number of COVID-19 cases) and April 1 to June 1, 2020 (weather variables).



**Table 1.** Spearman correlation coefficients ( $\rho$ ) and their P-values between COVID-19 cases and weather variables.

| <b>Weather variable</b>                                       | <b>Spearman's <math>\rho</math></b> | <b>P-value</b> |
|---------------------------------------------------------------|-------------------------------------|----------------|
| Average daily temperature [°C]                                | -0.1195                             | 0.3589         |
| Relative humidity [%]                                         | 0.0389                              | 0.7636         |
| Wind speed [m/s]                                              | 0.1355                              | 0.2937         |
| Ground level ozone concentration [ $\mu\text{g}/\text{m}^3$ ] | -0.2997*                            | 0.0180         |

\* Correlation is significant at the 0.05 level (two-tailed).
